# Supplementary material for: Designing an Electronic Patient Management System for Multiple Sclerosis: Building a Next Generation Multiple Sclerosis Documentation System
Source: PubMed Central journal article supplement (PMC4723723; doi:10.2196/ijmr.4549), 2016-01-08
Supplement: ijmr_v5i1e2_app1.pdf [file ijmr_v5i1e2_app1.pdf]

**Multimedia Appendix 1. Questionnaire on the use of health information technology in neurological practices and on the needs of neurologists for future eHealth services.**

| No.                                                                                                   | Question/Answers                                                                                                                                                                                                                                                                                                                                    |
|-------------------------------------------------------------------------------------------------------|-----------------------------------------------------------------------------------------------------------------------------------------------------------------------------------------------------------------------------------------------------------------------------------------------------------------------------------------------------|
| <p><b>[1]</b><br/>[1a]<br/>[1b]<br/>[1c]</p>                                                          | <p><b>You are working as ...</b><br/>Neurologist &amp; Psychiatrist<br/>Neurologist<br/>Further qualifications: (Free text)</p>                                                                                                                                                                                                                     |
| <p><b>[2]</b><br/>[2a]<br/>[2b]</p>                                                                   | <p><b>Do you work in a practice which is specialized in MS?</b><br/>Yes<br/>No</p>                                                                                                                                                                                                                                                                  |
| <p><b>[3]</b><br/>[3a]<br/>[3b]<br/>[3c]</p>                                                          | <p><b>How many patients have been treated in your practice within the last quarter?</b><br/>Less than 100<br/>Between 100 and 200<br/>More than 200</p>                                                                                                                                                                                             |
| <p><b>[4]</b><br/>[4a]<br/>[4b]</p>                                                                   | <p><b>You are working in ...</b><br/>a private practice<br/>a hospital</p>                                                                                                                                                                                                                                                                          |
| <p><b>[5]</b><br/>[5a]<br/>[5b]<br/><b>[5c]</b><br/>[5c1]<br/>[5c2]<br/>[5c3]<br/>[5c4]<br/>[5c5]</p> | <p><b>Do you access the Internet in your practice?</b><br/>Yes<br/>No<br/><b>If so, what do you use it for? (Multiple answers possible)</b><br/>Research (e.g. addresses, latest study results)<br/>Clinical documentation<br/>Documentation on intervention studies<br/>Documentation on non-intervention studies (NIS)<br/>Other: (Free text)</p> |
| <p><b>[6]</b><br/>[6a]<br/>[6b]<br/>[6c]</p>                                                          | <p><b>How is patient data documented?</b><br/>Documentation of patient data via an IT network<br/>Documentation of patient data on a single IT device<br/>Other: (Free text)</p>                                                                                                                                                                    |
| <p><b>[7]</b><br/>[7a]<br/>[7b]</p>                                                                   | <p><b>Are the IT devices in your practice continuously connected to the Internet?</b><br/>Yes<br/>No</p>                                                                                                                                                                                                                                            |
| <p><b>[8]</b></p>                                                                                     | <p><b>Which type of data transmission do you prefer (e.g. for connection with</b></p>                                                                                                                                                                                                                                                               |

| No.                                                                                                  | Question/Answers                                                                                                                                                                                                                                                                                                                                                                                                                                                                                                                                                                                                                         |
|------------------------------------------------------------------------------------------------------|------------------------------------------------------------------------------------------------------------------------------------------------------------------------------------------------------------------------------------------------------------------------------------------------------------------------------------------------------------------------------------------------------------------------------------------------------------------------------------------------------------------------------------------------------------------------------------------------------------------------------------------|
| [8a]<br>[8b]                                                                                         | <p><b>research registers)?</b></p> <p>Online (via continuous Internet connection)</p> <p>Offline</p>                                                                                                                                                                                                                                                                                                                                                                                                                                                                                                                                     |
| [9]<br>[9a]<br>[9b]<br>[9c]<br>[9d]<br>[9d1]<br>[9d2]<br>[9d3]<br>[9d4]<br>[9d5]                     | <p><b>How can eHealth services assist <u>you</u> in your daily duties as a physician?</b></p> <p>eHealth services can be beneficial in any way.</p> <p>eHealth services do not provide any use to me.</p> <p>eHealth services can partially be beneficial to me.</p> <p><b>If so, in which aspects can eHealth services assist <u>you</u> in your daily duties as a physician? (Multiple answers possible)</b></p> <p><i>Protection</i> against recourses and for audits</p> <p>Clinical documentation</p> <p>Documentation on intervention studies</p> <p>Documentation on non-intervention studies (NIS)</p> <p>Other: (Free text)</p> |
| [10]<br>[10a]<br>[10b]<br>[10c]<br>[10d]<br>[10d1]<br>]<br>[10d2]<br>]<br>[10d3]<br>]<br>[10d4]<br>] | <p><b>How can eHealth services assist <u>your nurses</u> in their daily duties?</b></p> <p>eHealth services can be beneficial in any way.</p> <p>eHealth services do not provide any use to them.</p> <p>eHealth services can partially be beneficial to them.</p> <p><b>If so, in which aspects can eHealth services assist <u>your nurses</u> in their daily duties? (Multiple answers possible)</b></p> <p>Clinical documentation</p> <p>Documentation on intervention studies</p> <p>Documentation on non-intervention studies (NIS)</p> <p>Other: (Free text)</p>                                                                   |
| [11]<br>[11a]<br>[11b]<br>[11c]                                                                      | <p><b>Would you like to share information with your patients for patient education via eHealth services?</b></p> <p>Yes</p> <p>No</p> <p>Partially yes</p>                                                                                                                                                                                                                                                                                                                                                                                                                                                                               |

| No.                                                                                                                                                                                                        | Question/Answers                                                                                                                                                                                                                                                                                                                                                                                                                                                                                         |
|------------------------------------------------------------------------------------------------------------------------------------------------------------------------------------------------------------|----------------------------------------------------------------------------------------------------------------------------------------------------------------------------------------------------------------------------------------------------------------------------------------------------------------------------------------------------------------------------------------------------------------------------------------------------------------------------------------------------------|
| <p><b>[12]</b></p> <p>[12a]</p> <p>[12b]</p> <p>[12c]</p>                                                                                                                                                  | <p><b>Can eHealth services assist you in your physician-patient-communication?</b></p> <p>Yes</p> <p>No</p> <p>Partially yes</p>                                                                                                                                                                                                                                                                                                                                                                         |
| <p><b>[13]</b></p> <p>[13a]</p> <p>[13b]</p> <p>[13c]</p>                                                                                                                                                  | <p><b>Can eHealth services assist you in retrieving patient data?</b></p> <p>Yes</p> <p>No</p> <p>Partially yes</p>                                                                                                                                                                                                                                                                                                                                                                                      |
| <p><b>[14]</b></p> <p>[14a]</p> <p>[14b]</p> <p>[14c]</p>                                                                                                                                                  | <p><b>Can eHealth services assist you in diagnosing specific MS symptoms and courses of disease?</b></p> <p>Yes</p> <p>No</p> <p>Partially yes</p>                                                                                                                                                                                                                                                                                                                                                       |
| <p><b>[15]</b></p> <p>[15a]</p> <p>[15b]</p> <p><b>[15c]</b></p> <p>[15c1]</p> <p>]</p> <p>[15c2]</p> <p>]</p> <p>[15c3]</p> <p>]</p> <p>[15c4]</p> <p>]</p> <p>[15c5]</p> <p>]</p> <p>[15c6]</p> <p>]</p> | <p><b>Do you consider an MS-specific clinical documentation desirable?</b></p> <p>Yes</p> <p>No</p> <p><b>If so, which aspects should be considered? (Multiple answers possible)</b></p> <p>Clinical parameters (e.g. relapse rate, EDSS, progression)</p> <p>Parameters of quality of life</p> <p>Symptomatic parameters (e.g. for depression, fatigue)</p> <p>Further clinical parameters: (Free text)</p> <p>Further patient-related parameters: (Free text)</p> <p>Other parameters: (Free text)</p> |
| <p><b>[16]</b></p> <p>[16a]</p> <p>[16b]</p>                                                                                                                                                               | <p><b>Do you consider a more connected electronic MS-specific clinical documentation desirable?</b></p> <p>Yes</p> <p>No</p>                                                                                                                                                                                                                                                                                                                                                                             |

| No.                                                                                                                                                       | Question/Answers                                                                                                                                                                                                                                                        |
|-----------------------------------------------------------------------------------------------------------------------------------------------------------|-------------------------------------------------------------------------------------------------------------------------------------------------------------------------------------------------------------------------------------------------------------------------|
| <p><b>[17]</b></p> <p>[17a]</p> <p>[17b]</p> <p>[17c]</p>                                                                                                 | <p><b>Future electronic documentation systems should assist you in ...</b></p> <p><b>(Multiple answers possible)</b></p> <p>Import of data from other systems</p> <p>Integration into clinical or research networks</p> <p>Further aspects: (Free text)</p>             |
| <p><b>[18]</b></p> <p>[18a]</p> <p>[18b]</p> <p><b>[18c]</b></p> <p>[18c1]</p> <p>]</p> <p>[18c2]</p> <p>]</p> <p>[18c3]</p> <p>]</p> <p><b>[18d]</b></p> | <p><b>Do you know the Multiple Sclerosis Documentation System (MSDS)?</b></p> <p>Yes</p> <p>No</p> <p><b>If so, which version do you use?</b></p> <p>MSDS Praxis</p> <p>MSDS Clinic</p> <p>None</p> <p><b>Are there any reasons for not using MSDS? (Free text)</b></p> |
